# Supplementary material
Source: PubMed Central journal article supplement (PMC7556150)
Supplement: advancesADV2020002237-suppl1.pdf [file advancesADV2020002237-suppl1.pdf]

## **Vuckovic et al. Supplementary data**

### **Vuckovic et al. Supplementary Materials and Methods**

#### **Fluorescence flow cytometry analyses**

Monoclonal antibodies (mAbs) used for fluorescence flow cytometry are listed in Supp. Table 1. Cells were acquired using a BD FACSCanto™ or LSRFortessa II flow cytometer (BD Biosciences, NJ, USA) and data analyzed using FlowJo software version 10.0.8r1 (BD Biosciences).

Oligoclonal expansions were defined in relation to the mean frequency of that TCR-V $\beta$  family within the PB-CD8<sup>+</sup>T<sub>N</sub> compartment of age-matched healthy blood donors, indicative of normal TCR-V $\beta$  family usage during generation of the T cell repertoire.

#### **Mass cytometry staining and data acquisition**

All metal-conjugated mAbs were validated, pre-titered and supplied in per-test amounts by the Ramaciotti Facility for Human Systems Biology Mass Cytometry Reagent Bank. Reagent bank mAb were either purchased from Fluidigm® in pre-conjugated form or in a carrier-protein-free form and conjugated by the Ramaciotti Facility for Human Systems Biology with the indicated metal isotope using the MaxPAR conjugation kit (Fluidigm®, South San Francisco, CA) according to the manufacturer's protocol. Cells were fixed overnight in 4% paraformaldehyde supplemented with a DNA intercalator (0.125  $\mu$ M 191/193-Iridium; Fluidigm®) followed by two washes in FACS buffer and two in MilliQ water. Cell concentration was adjusted to  $0.8 \times 10^6$  cells/mL in MilliQ water supplemented with EQ beads (Fluidigm®, 1 in 10 vol/vol) and filtered through a 35  $\mu$ m nylon mesh. Signal was normalized to signal intensity of the EQ beads, recorded by the in-built Helios software and exported to .fcs file for further analysis.

#### **Analysis of mass cytometry data**

FlowSOM and tSNE algorithms were run using mass cytometry data selected for minimal batch fluctuation and included matched BM and PB samples from 3 MGUS and 5 NDMM patients. Data were further interrogated by manual gating utilizing all available mass cytometry data from paired BM and PB of the total MGUS (n = 4) and NDMM (n = 8) patients. The data were randomly down sampled to 6504 cells (based on the smallest size of the T<sub>TE</sub> compartment among all samples (n = 16) to ensure that there was no bias between samples. The FlowSOM algorithm (FlowSOM\_seed = 45, FlowSOM\_meta\_seed = 9) was applied to the concatenated data (16 samples x 6504 cells = 104,064 cells), classifying cells initially into 100 clusters and

subsequently into 25 meta clusters (MC) based on the median signal intensity of 15 antigens associated with T cell differentiation and function (Supp. Table 2). The same concatenated data used for FlowSOM were used to create tSNE plots with the following parameters: perplexity = 30, theta = 0.5 and 1,000 iterations.

**Vuckovic et al. Supplementary Tables**

**Supp. Table 1. List of mAbs used in fluorescence flow cytometry**

| <b>Antigen</b>           | <b>Clone</b> | <b>Supplier</b>            |
|--------------------------|--------------|----------------------------|
| CD3 V500                 | UCHT1        | BD                         |
| CD4 PerCP-Cy5.5          | SK3          | BD                         |
| CD8 APC-H7               | SK1          | BD                         |
| CD28 APC                 | CD28.2       | BD                         |
| CD45RO PE-Cy7            | UCHL-1       | BD                         |
| CD57 eFluor 450          | TB01         | eBiosciences               |
| CD69 APC                 | FN50         | BD                         |
| CD103 PE                 | Ber-ACT8     | BD                         |
| IFN- $\gamma$ APC        | 6401.1111    | BD                         |
| TNF- $\alpha$            | 4S.B3        | BD                         |
| Cleaved Caspase3 AF488   | D175         | Cell Signalling Technology |
| Rabbit mAb IgG AF488     | DA1E         | Cell Signalling Technology |
| CD3 PerCP-Cy5.5          | SK7          | BD                         |
| CD57 PE-Cy7              | HNK-1        | Biolegend                  |
| CD38 V450                | HB7          | BD                         |
| CD4 V450                 | RPA-T4       | BD                         |
| CD4 APC-H7               | SK3          | BD                         |
| CD45 RO FITC             | UCHL-1       | BD                         |
| CD3 V450                 | UCHT1        | BD                         |
| CD28 PE-Cy7              | CD28.2       | BD                         |
| CD38 APC                 | HIT2         | BD                         |
| CD107a BV421             | H4A3         | BD Biosciences             |
| TCR $\gamma\delta$ -1 PE | 11F2         | BD                         |
| CD56 FITC                | NCAM 16.2    | BD                         |
| CD16 FITC                | NKP15        | BD                         |

**Supp. Table 2. List of mAbs used in mass cytometry**

| <b>Antigen</b>                    | <b>Clone</b>       | <b>Metal conjugate</b> |
|-----------------------------------|--------------------|------------------------|
| CD160-AF647                       | BY55               | N/A                    |
| CD56                              | REA196             | 113In                  |
| CD8A                              | RPA-T8             | 115In                  |
| CD57 # *                          | HCD57              | 139La                  |
| CD49d # *                         | 9F10               | 141Pr                  |
| CD19                              | HIB19              | 142Ce                  |
| CD45RA # *                        | HI100              | 143Nd                  |
| CD69 # *                          | FN50               | 144Nd                  |
| CD4                               | RPA-T4             | 145Nd                  |
| Cy5 (For AF647detection)          | CY5-15             | 147Sm                  |
| CD28 # *                          | CD28.2             | 148Sm                  |
| CD366 (Tim3)                      | 7D3                | 149Sm                  |
| KLRG1 # *                         | SA231A             | 150Sm                  |
| CD39 # *                          | A1                 | 151Eu                  |
| CD45RO # *                        | UCHL1              | 152Sm                  |
| CD62L # *                         | DREG-56            | 153Eu                  |
| CD137 (41BB)                      | 4B4-1              | 155Gd                  |
| CD279 (PD-1) # *                  | EH12.2H7           | 156Gd                  |
| CD197 (CCR7) # *                  | 150503             | 159Tb                  |
| CD223 (Lag3)                      | 17B4               | 160Dy                  |
| CD122 (IL-2RB)                    | TU27               | 161Dy                  |
| V $\beta$ 21.3 *                  | IG125              | 162Dy                  |
| CD183 (CXCR3)                     | REA232             | 163Dy                  |
| CD274 (PDL1)                      | MIH1               | 164Dy                  |
| V $\beta$ 8 *                     | 56C5.2             | 165Ho                  |
| TIGIT #                           | MBSA43             | 166Er                  |
| CD27 #                            | M-T271             | 167Er                  |
| CD25                              | M-A251             | 169Tm                  |
| CD3                               | UCHT1              | 170Yb                  |
| CD38 #                            | HIT2               | 172Yb                  |
| Integrin B7                       | FIB504             | 173Yb                  |
| V $\beta$ 5.1 or V $\beta$ 13.1 * | IMMU157 or IMMU222 | 174Yb                  |
| CD127 # *                         | A019D5             | 176Lu                  |
| EOMES                             | WD1928             | 146Nd                  |
| Ki67                              | B56                | 168Er                  |
| Granzyme B                        | GB11               | 171Yb                  |
| Perforin                          | B-D48              | 175Lu                  |
| T-bet                             | 4B10               | 209Bi                  |

#Antigen used for FlowSOM clustering; \*Antigen used for tSNE analysis; N/A, Not applicable.

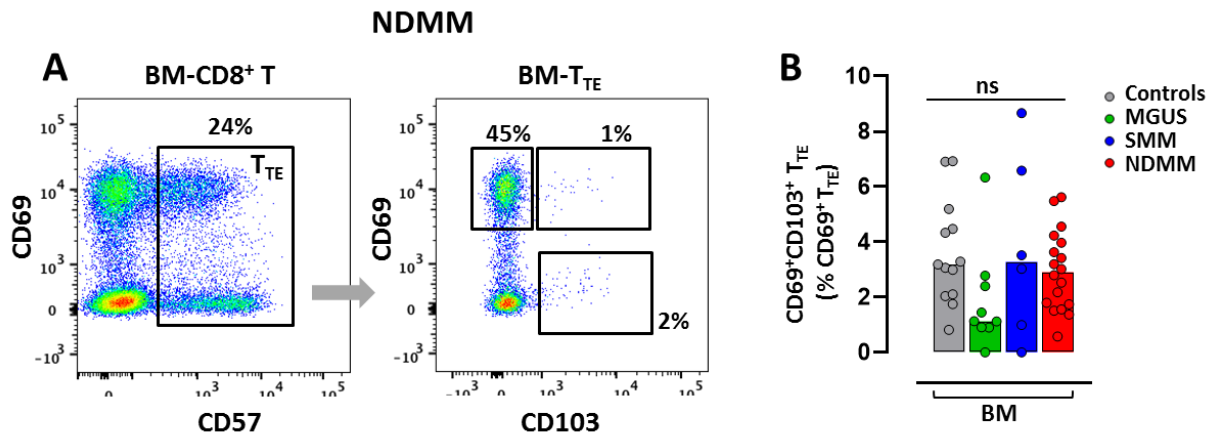

**Supplementary Figure 1. Expression of CD103 on BM-CD69<sup>+</sup>T<sub>TE</sub>.** (A) Representative dot plot show expression of CD69 and CD103 on BM-CD57<sup>+</sup>T<sub>TE</sub> cells in a NDMM patient. (B) Bars (median with scatter plots) show the proportion of CD69<sup>+</sup>CD103<sup>+</sup>T<sub>TE</sub> cells within CD69<sup>+</sup>T<sub>TE</sub> cells in the BM of controls (n = 14), MGUS (n = 9), SMM (n = 6) and NDMM (n = 18) patients. (Kruskal-Wallis test with Dunn's multiple comparisons; ns, not significant).

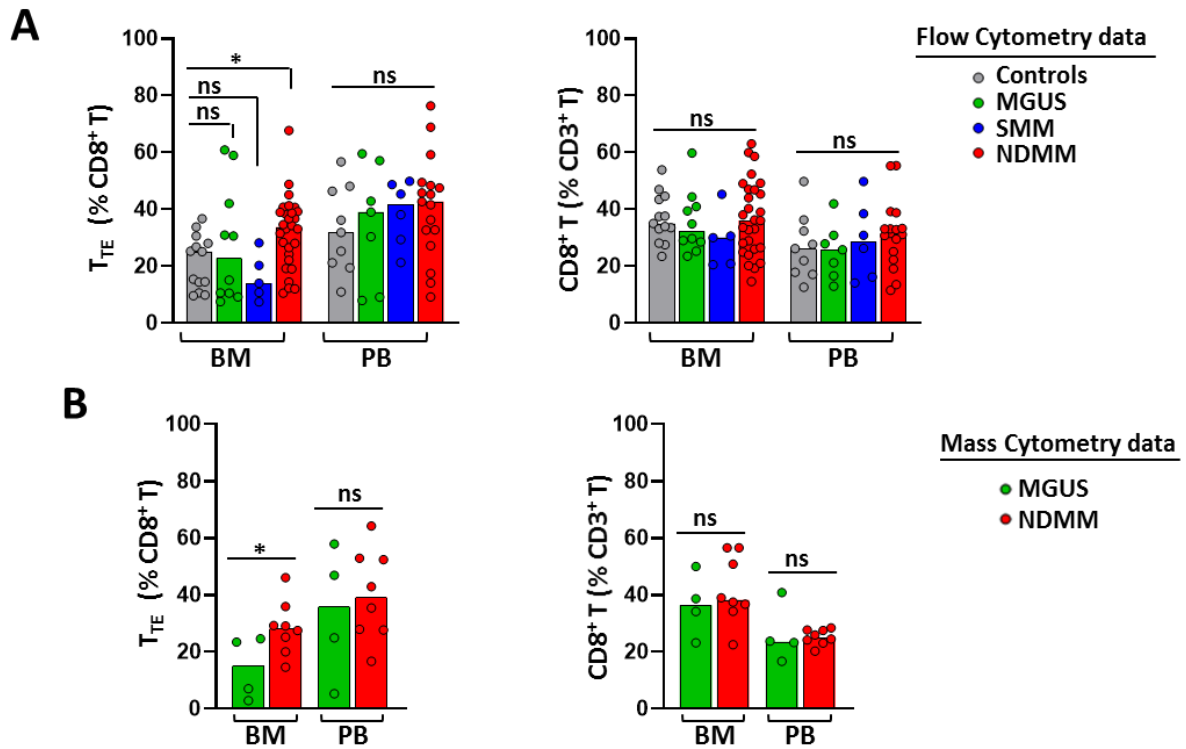

**Supplementary Figure 2. Proportions of total  $T_{TE}$  and  $CD8^+$  T cells in the BM and PB of controls, MGUS, SMM and NDMM patients. (A) Fluorescence flow cytometry data, (B) Mass cytometry data. (A) Bars (median with scatter plots) show proportions of  $T_{TE}$  and  $CD8^+$  T cells in the BM of controls ( $n = 13$ ), MGUS ( $n = 10$ ), SMM ( $n = 5$ ) and NDMM ( $n = 28$ ) and PB of controls ( $n = 9$ ), MGUS ( $n = 7$ ), SMM ( $n = 6$ ) and NDMM ( $n = 17$ ). (Kruskal-Wallis test with Dunn's multiple comparisons; \*  $p < 0.05$ ; ns, not significant). (B) Bars (median with scatter plots) show proportions of  $T_{TE}$  and  $CD8^+$  T cells in the BM and PB of NDMM ( $n = 8$ ) and MGUS patients ( $n = 4$ ). (Mann Whitney test; \*  $p < 0.05$ ; ns, not significant).**

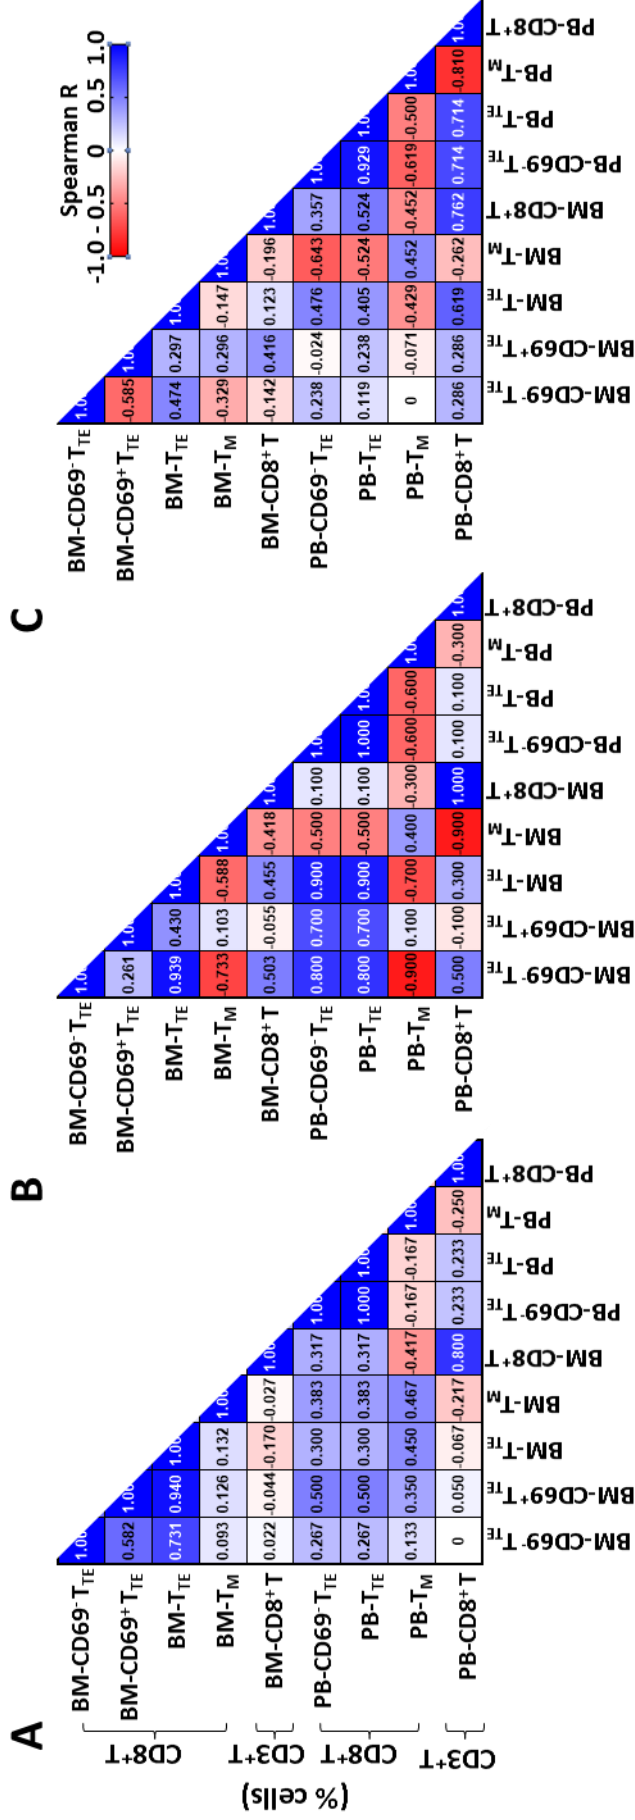

**Supplementary Figure 3. Relationships between proportions of CD69<sup>+</sup>T<sub>TE</sub>, CD69<sup>+</sup>T<sub>TE</sub>, T<sub>TE</sub>, T<sub>M</sub> and CD8<sup>+</sup>T cells in controls, MGUS and NDMM patients. (A-B)** The matrix shows correlations between proportions of CD69<sup>+</sup>T<sub>TE</sub>, CD69<sup>+</sup>T<sub>TE</sub>, T<sub>TE</sub>, T<sub>M</sub>, T<sub>M</sub> (CD8<sup>+</sup>CD45RO<sup>+</sup>CD57<sup>+</sup>) and CD8<sup>+</sup>T cells in the BM and PB of (A) controls, (B) MGUS and (C) NDMM patients. Proportions of CD69<sup>+</sup>T<sub>TE</sub>, CD69<sup>+</sup>T<sub>TE</sub>, T<sub>TE</sub> and T<sub>M</sub> are presented as % CD8<sup>+</sup>T cells and proportion of CD8<sup>+</sup>T as % CD3<sup>+</sup>T cells (also shown in Fig. 2A-C). Each cell within matrix is labeled with corresponding Spearman R values.

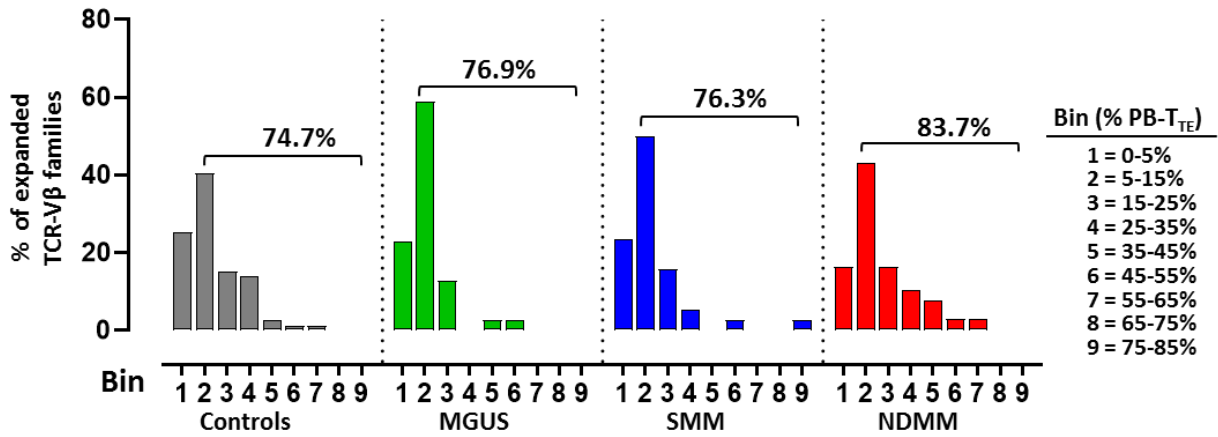

**Supplementary Figure 4. Oligoclonal expansions within PB-T<sub>TE</sub> of Controls, MGUS, SMM and NDMM.** Plot shows the size distribution of expanded TCR-V $\beta$  family-expressing populations within PB-T<sub>TE</sub> in controls, MGUS, SMM and NDMM patients (also shown in Fig. 3A). Numbers indicate proportions of expanded TCR-V $\beta$  family above an empiric cut-off of 5% of PB-T<sub>TE</sub> cells.

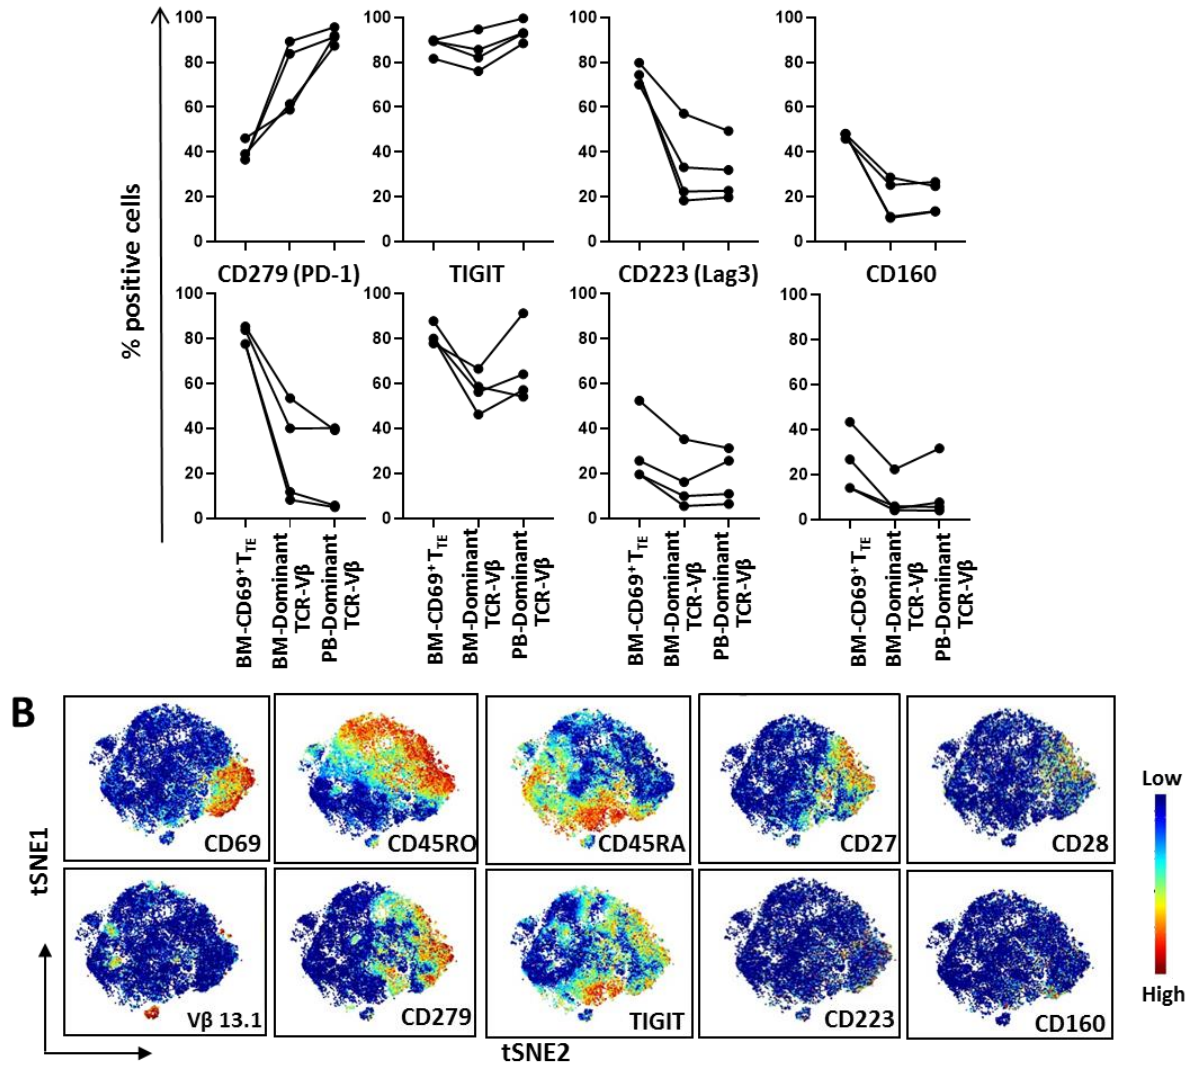

**Supplementary Figure 5. Phenotype of BM-CD69<sup>+</sup>T<sub>TE</sub> cells and CD69-T<sub>TE</sub> cells expressing dominant TCR-Vβ in the BM and PB of NDMM patients defined by mass cytometry. (A)** Proportion of cells expressing the indicated antigen within BM-CD69<sup>+</sup>T<sub>TE</sub> and BM-T<sub>TE</sub> and PB-T<sub>TE</sub> expressing dominant TCR-Vβ families. Cells from individual NDMM patients are connected by a line. Data were obtained by manual gating of mass cytometry data using FlowJo software version 10.0.8r1. **(B)** tSNE plots show the distribution of the indicated antigen within pooled BM-T<sub>TE</sub> cells of NDMM patients (n = 5).
